# Supplementary material for: (Photo)electrocatalysis of molecular oxygen reduction by S-doped graphene decorated with a star-shaped oligothiophene
Source: Royal Society of Chemistry journal article supplement (doi:10.1039/c9nr01620a), 2019-01-01
Supplement: c9nr01620a1.pdf [file c9nr01620a1.pdf]

**ELECTRONIC SUPPLEMENTARY INFORMATION**

**(Photo)electrocatalysis of molecular oxygen reduction by S-doped graphene  
decorated with a star-shaped oligothiophene**

Anastasios Stergiou,\* Dimitris K. Perivoliotis and Nikos Tagmatarchis\*

*Theoretical and Physical Chemistry Institute, National Hellenic Research Foundation, 48 Vassileos Constantinou  
Avenue, 11635 Athens, Greece. E-mail: [astergiou@eie.gr](mailto:astergiou@eie.gr) (A. Stergiou); [tagmatar@eie.gr](mailto:tagmatar@eie.gr) (N. Tagmatarchis).*

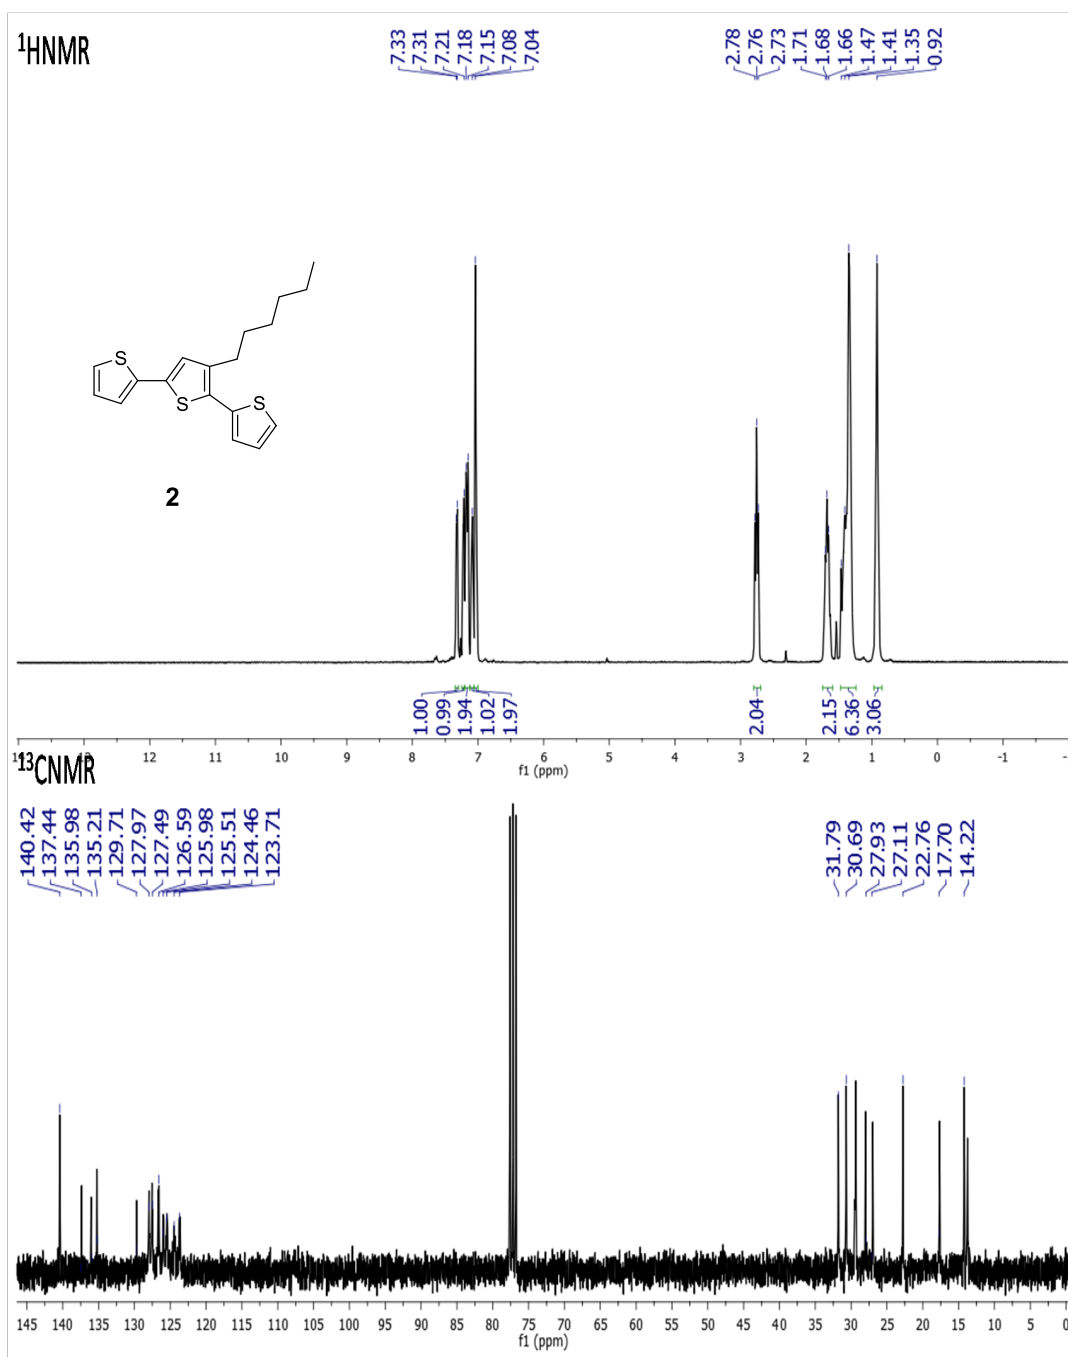

**Figure S1.** <sup>1</sup>H and <sup>13</sup>C NMR spectra of compound **2** obtained in CDCl<sub>3</sub>.

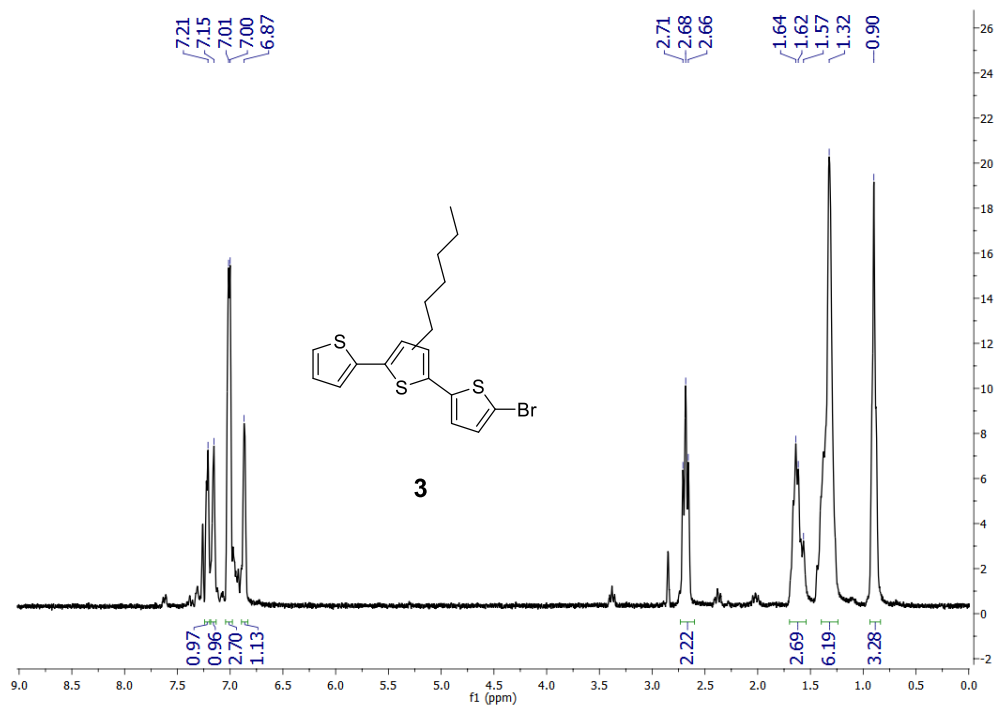

**Figure S2.**  $^1\text{H}$  NMR spectrum of compound **3** obtained in  $\text{CDCl}_3$ .

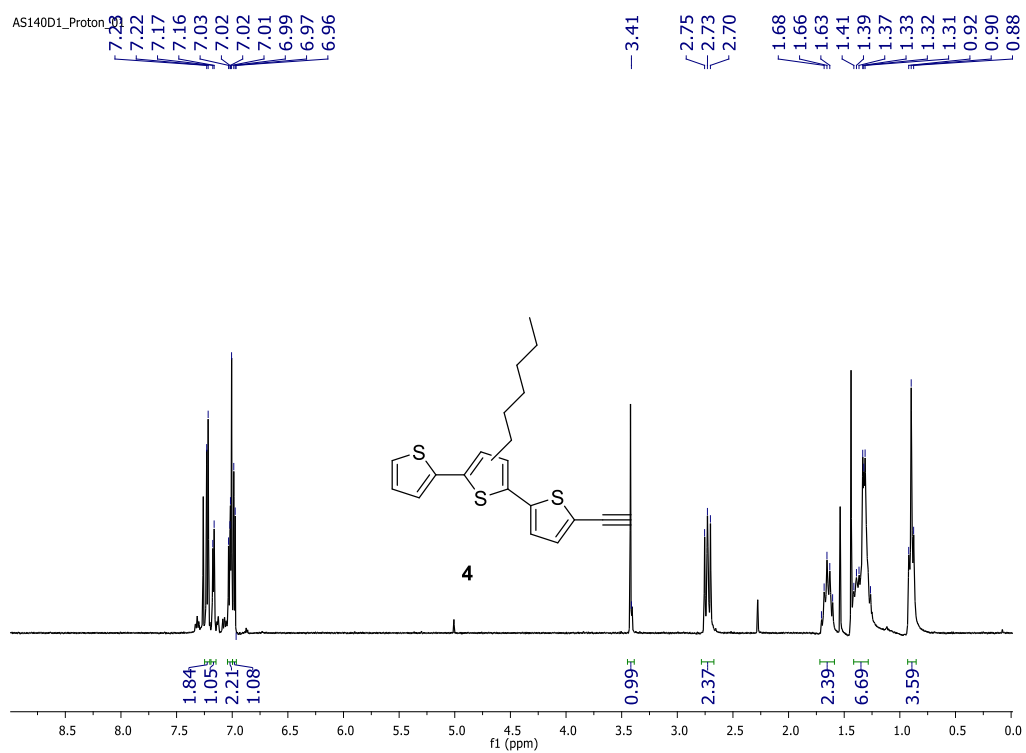

**Figure S3.**  $^1\text{H}$  NMR spectrum of compound **4** obtained in  $\text{CDCl}_3$ .

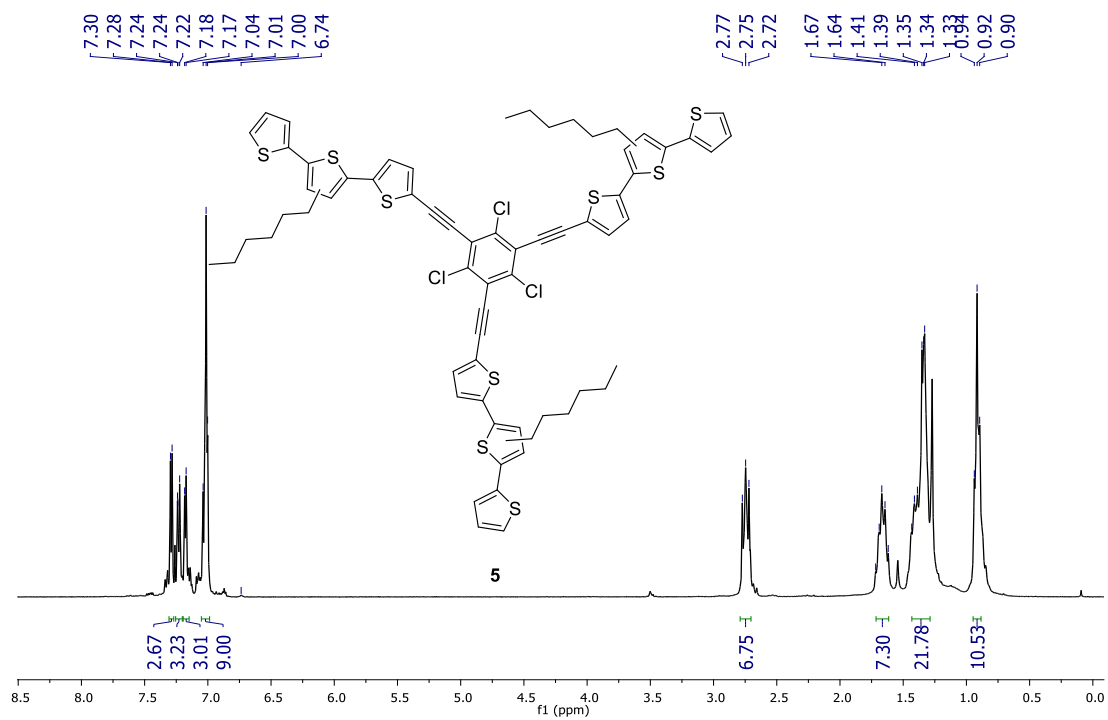

**Figure S4.** <sup>1</sup>H NMR spectrum of star-shaped compound **5** obtained in CDCl<sub>3</sub>.

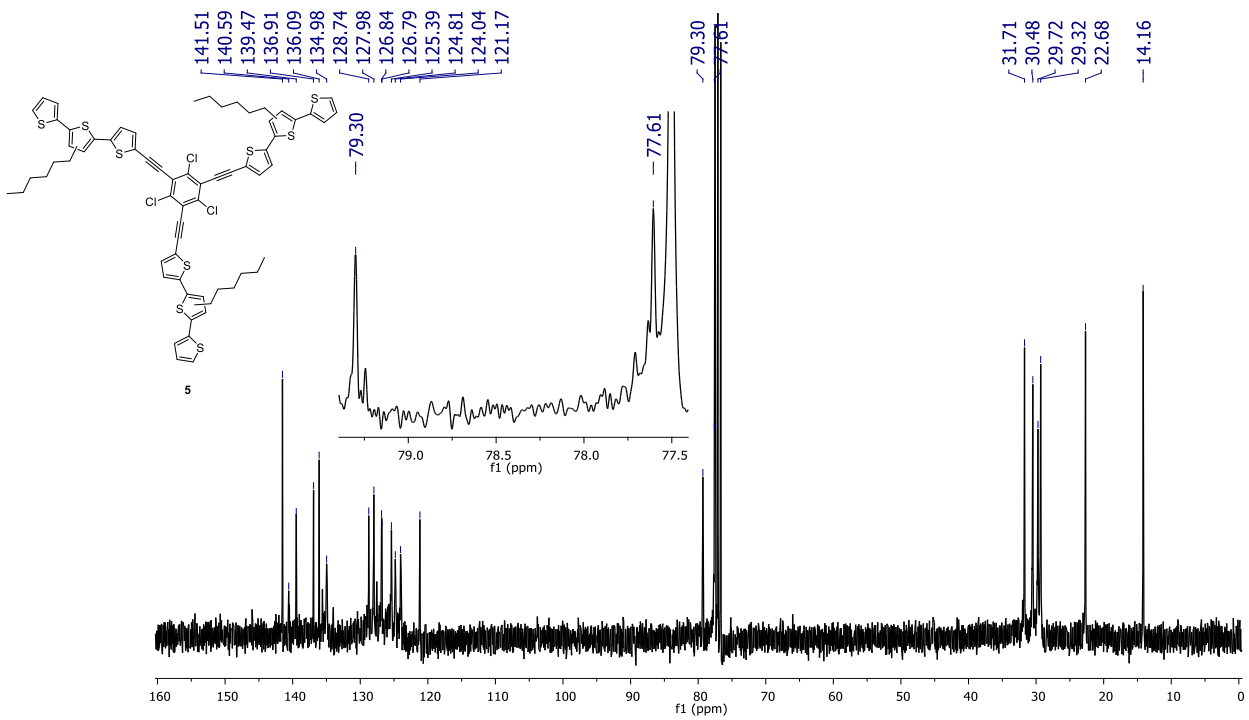

**Figure S5.**  $^{13}\text{C}$  NMR spectrum of compound **5** obtained in  $\text{CDCl}_3$ .

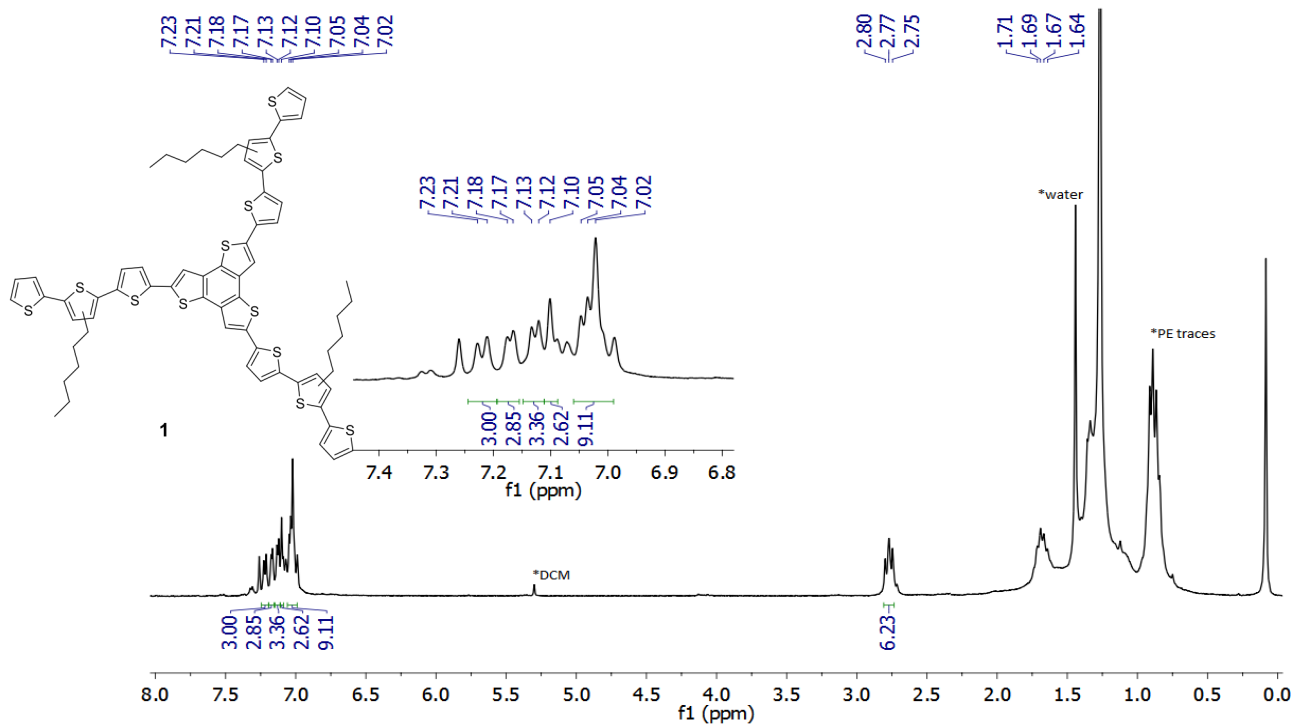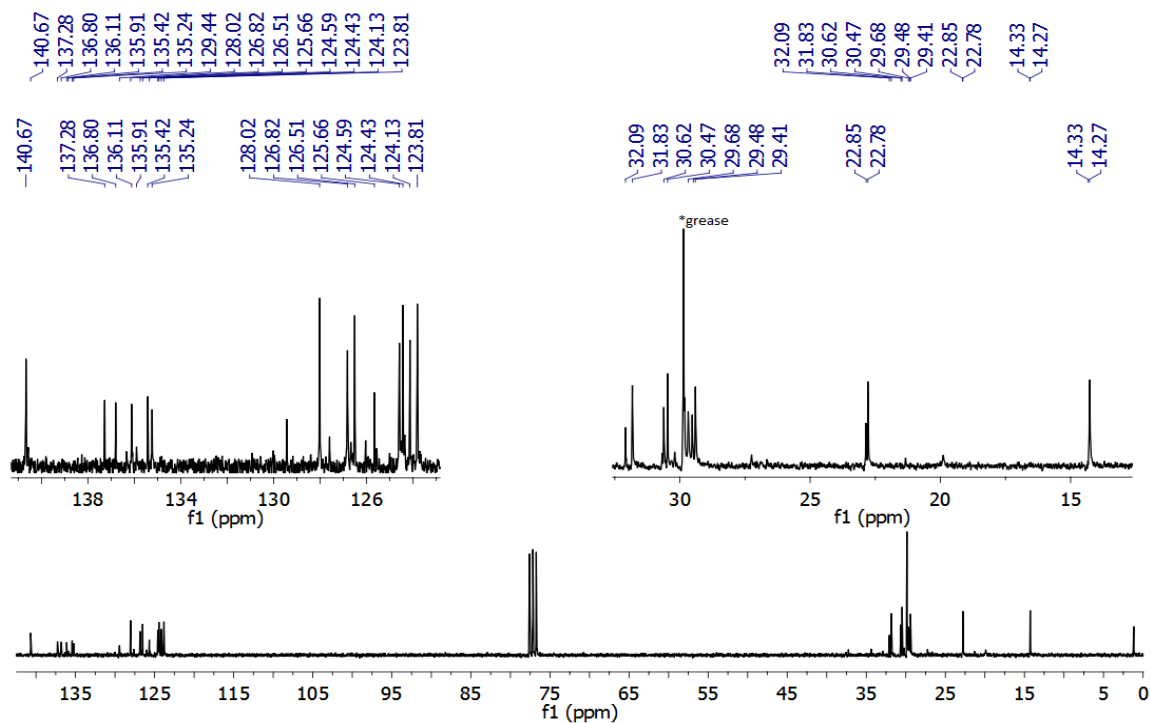

**Figure S6.**  $^1\text{H}$  and  $^{13}\text{C}$  NMR spectra of star-shaped oligothiophene **1** obtained in  $\text{CDCl}_3$ .

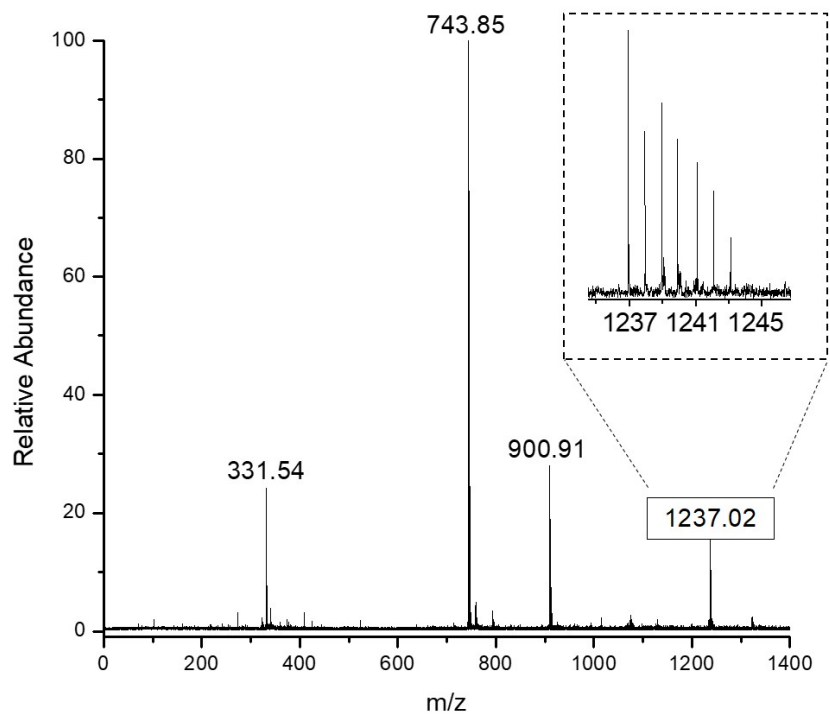

**Figure S7.** MALDI-TOF mass spectrum of oligothiophene **1**.



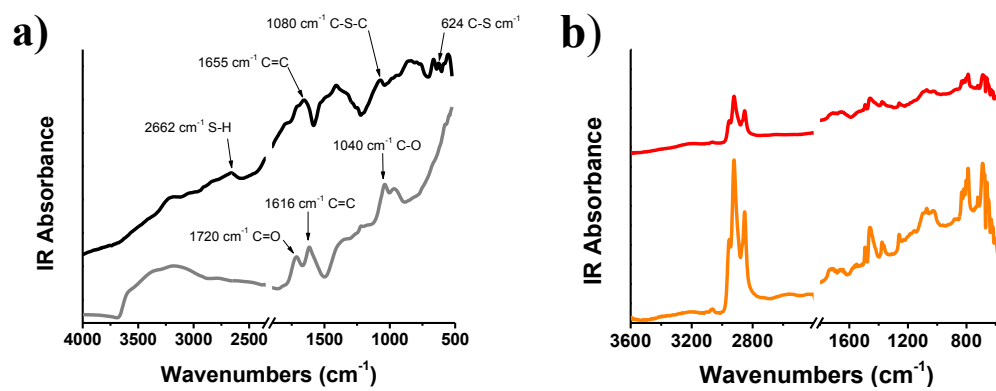

**Figure S8.** ATR-IR spectra of (a) **GO** (grey) and **SG** (black), and (b) **1** (orange) and **1/SG** (red).

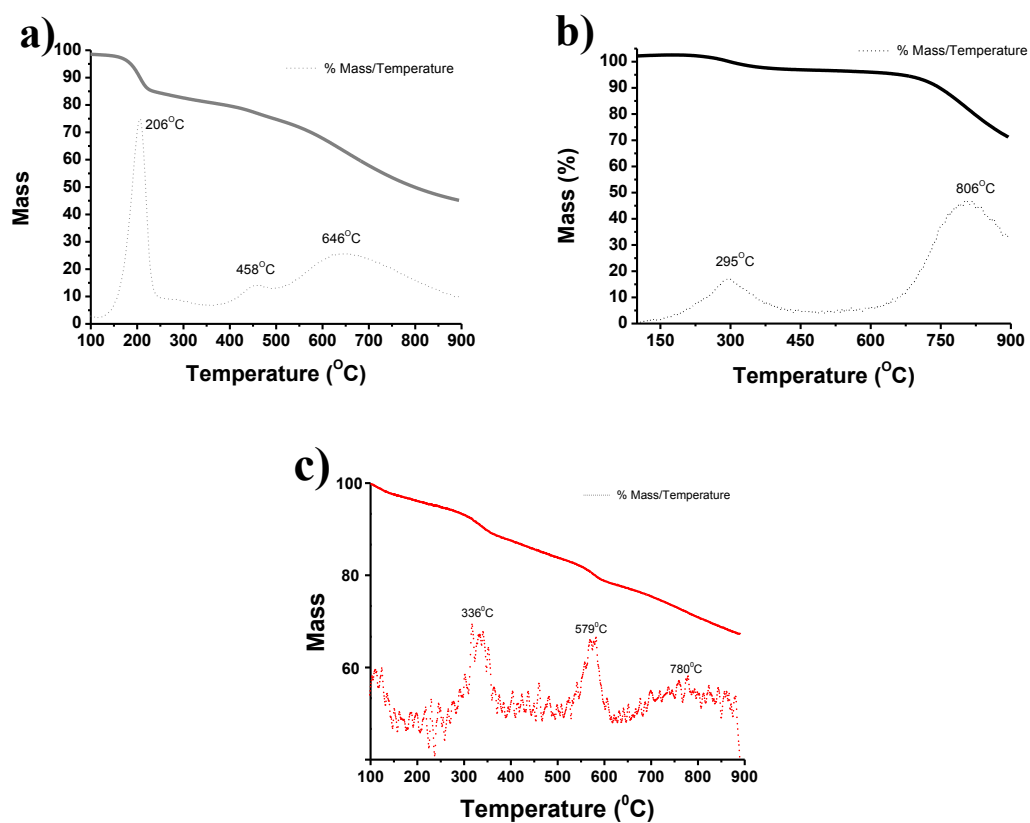

**Figure S9.** TGA graphs of (a) GO (grey), (b) SG (black) and (c) 1/SG (red). Dotted lines represent the first derivative of mass/temperature.

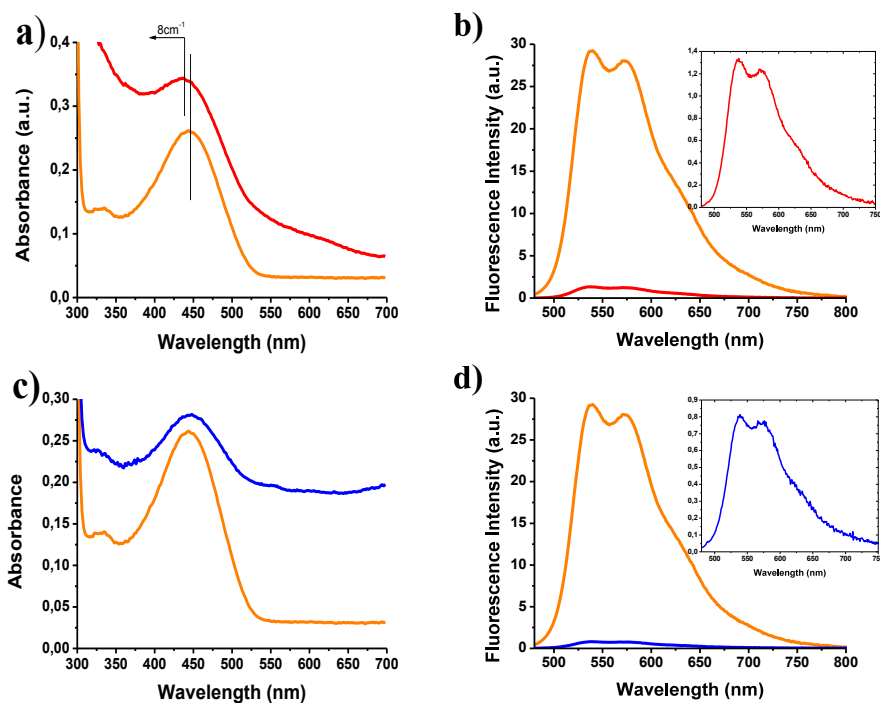

**Figure S10.** (a) UV-Vis and (b) fluorescence emission ( $\lambda_{\text{exc}}$  441 nm) spectra of **1** (orange) and **1/SG** (red) recorded in benzonitrile. (c, d) UV-Vis and fluorescence emission ( $\lambda_{\text{exc}}$  441 nm) spectra of reference **1/GO** (blue). The insets of (b, d) represent the magnified fluorescence emission intensity of the ensembles.

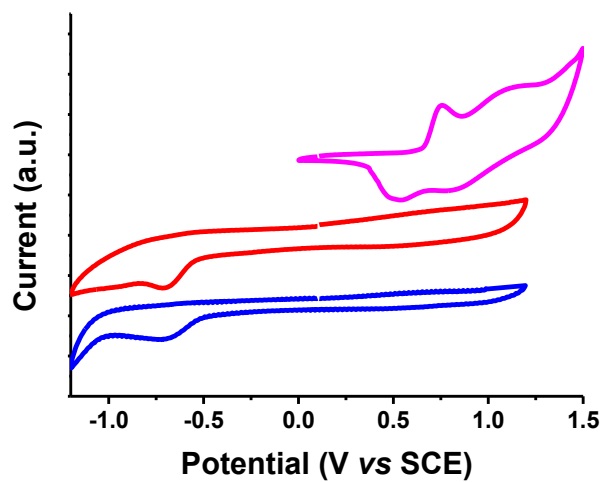

**Figure S11.** CV of **1** (magenta), **1/SG** (red) and **1/GO** (blue) in N<sub>2</sub>-saturated 0.1 M TBAPF<sub>6</sub> in benzonitrile.

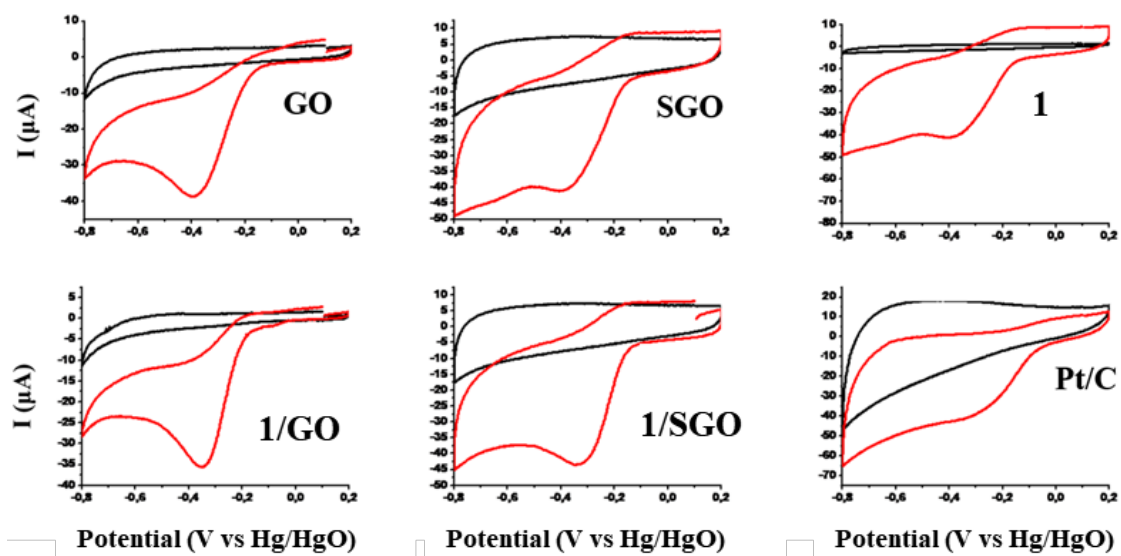

**Figure S12.** CV curves for **GO**, **SG**, **1**, **1/GO**, **1/SG** and commercial **Pt/C** in  $\text{N}_2$  (black) and  $\text{O}_2$  (red) saturated aqueous 0.1M KOH electrolyte.

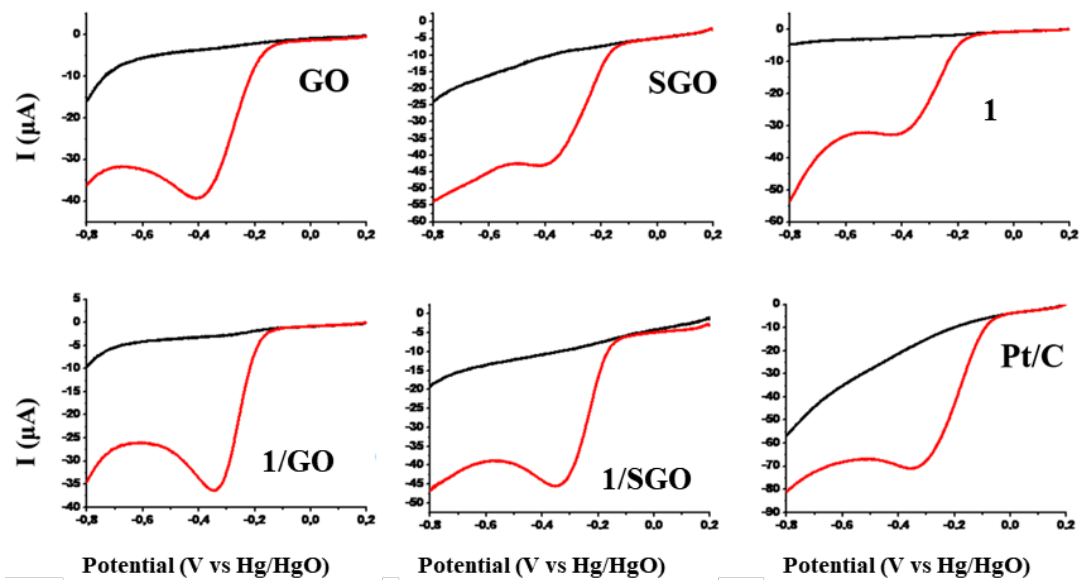

**Figure S13.** LSV curves for GO, SG, 1, 1/GO, 1/SG and commercial Pt/C in  $\text{N}_2$  (black) and  $\text{O}_2$  (red) saturated aqueous 0.1M KOH electrolyte.

**Table S1.** Onset ( $E_{on}$ ) and peak ( $E_p$ ) reduction potentials of the electrocatalytic  $O_2$  reduction derived from the CV and LSV curves recorded in  $O_2$  saturated aqueous 0.1M KOH electrolyte and at a scan rate of 50 mV/s. All potentials are versus the Hg/HgO electrode, at 25 $^{\circ}$ C.

| <b>Material</b>     | <b>ORR <math>E_{on}</math><br/>(CV)</b> | <b>ORR <math>E_p</math><br/>(CV)</b> | <b>ORR <math>E_{on}</math><br/>(LSV)</b> | <b>ORR <math>E_p</math><br/>(LSV)</b> |
|---------------------|-----------------------------------------|--------------------------------------|------------------------------------------|---------------------------------------|
| <b>1</b>            | -194mV                                  | -391mV                               | -172mV                                   | -386mV                                |
| <b>GO</b>           | -181mV                                  | -390mV                               | -172mV                                   | -398mV                                |
| <b>SG</b>           | -133mV                                  | -377mV                               | -132mV                                   | -383mV                                |
| <b>1/GO</b>         | -179mV                                  | -345mV                               | -184mV                                   | -336mV                                |
| <b>1/SG</b>         | -129mV                                  | -320mV                               | -120mV                                   | -327mV                                |
| <b>Pt/C (5% Pt)</b> | -76mV                                   | -315mV                               | -78mV                                    | -323mV                                |

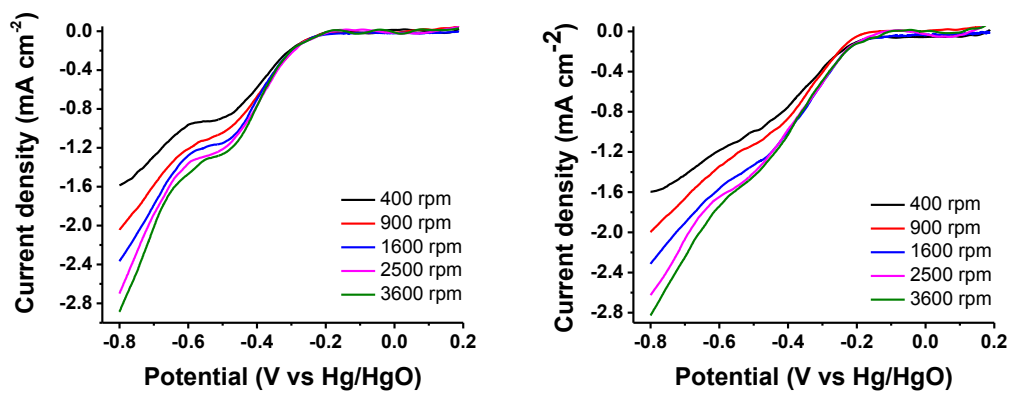

**Figure S14.** ORR polarization curves at 1600 rpm for SG (left panel) and 1/SG (right panel) recorded in O<sub>2</sub> saturated aqueous 0.1M KOH electrolyte vs Hg/HgO.



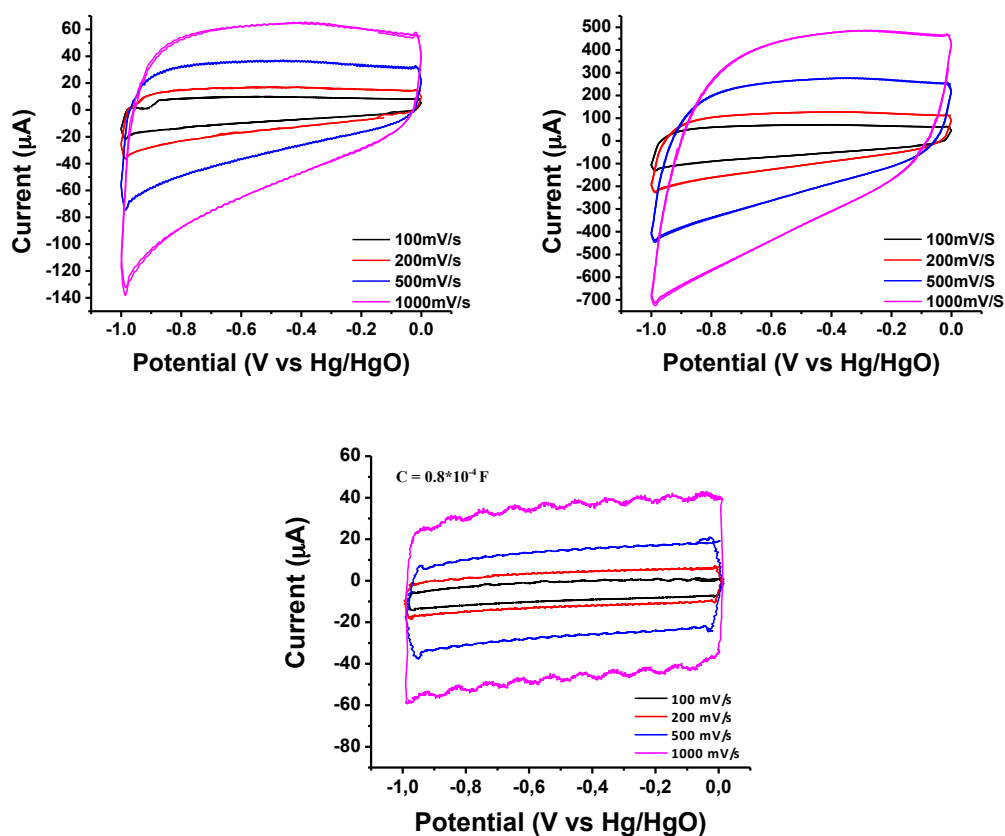

**Figure S15.** Capacitance curves for **SG** (up left panel), **1/SG** (up right panel) and **GO** (bottom panel) recorded in  $\text{N}_2$  saturated aqueous 0.1M KOH electrolyte at different scan rates (0.1, 0.2, 0.5 and 1.0 V/s) vs Hg/HgO. The capacitance was calculated to be  $0.8 \times 10^{-4}$  for **GO**,  $1.4 \times 10^{-4}$  for **SG** and  $9.5 \times 10^{-4}$  F for **1/SG** ensembles, by integrating the average graph-area derived by the voltammograms in different scan rates.

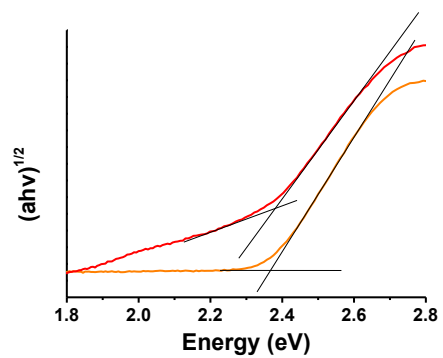

**Figure S16.** Tauc plots of  $1/SG$  (red) and  $1$  (orange) for calculating the band-gap.
